# Supplementary material
Source: PeerJ journal article supplement (doi:10.7717/peerj-cs.3648)

3x3 kernel  
Dilation Rate: 1

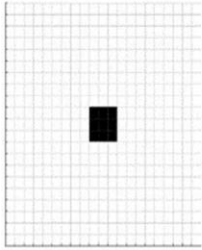

3x3 kernel  
Dilation Rate: 2

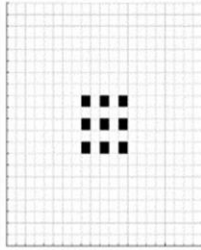

3x3 kernel  
Dilation Rate: 3

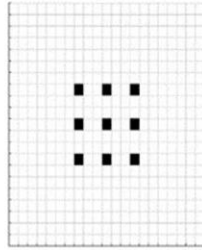

Supplement: Figure_S1.pdf [file Figure_S1.pdf]
